# Supplementary material for: Influence of angiotensin II type 1 receptors and angiotensin-converting enzyme I/D gene polymorphisms on the progression of Chagas’ heart disease in a Brazilian cohort: Impact of therapy on clinical outcomes
Source: PubMed Central journal article supplement (PMC11630595; doi:10.1371/journal.pntd.0012703), 2024-11-26
Supplement: pntd.0012703.s001.pdf [file pntd.0012703.s001.pdf]

# Influence of angiotensin II type 1 receptors and angiotensin-converting enzyme I/D gene polymorphisms on the progression of Chagas' heart disease in a Brazilian cohort: impact of therapy on clinical outcomes

**Running Title:** *AGTR1* and *ACE* I/D polymorphisms in Chagas' heart disease

Thayse do E.S. Protásio da Silva<sup>1\*</sup>, Lucia E. Alvarado-Arnez<sup>1,2,##,\*</sup>, Angelica M. Batista<sup>1\*</sup>, Silvia M.M. Alves<sup>1,3,4\*</sup>, Gloria Melo<sup>3</sup>, Cristina V. Carrazzone<sup>1</sup>, Isabelle de Oliveira Moraes<sup>2,##</sup>, Antonio G. Pacheco<sup>5</sup>, Camila Sarteschi<sup>3</sup>, Milton Ozório Moraes<sup>2§</sup>, Wilson Oliveira Jr<sup>3</sup>, Joseli Lannes-Vieira<sup>1</sup>

1 Laboratório de Biologia das Interações, Instituto Oswaldo Cruz/Fiocruz, Rio de Janeiro, Brazil

2 Laboratório de Hanseníase, Instituto Oswaldo Cruz/Fiocruz, Rio de Janeiro, Brazil

3 Ambulatório de Doença de Chagas e Insuficiência Cardíaca do Pronto Socorro Cardiológico de Pernambuco (PROCAPE)/UPE, Pernambuco, Brazil

4 Instituto do Coração (InCor), Escola de Medicina, Universidade de São Paulo, Brazil

5 Programa de Computação Científica, Fiocruz, Rio de Janeiro

\* These authors contribute equally to this work

# Current affiliation: Coordinación Nacional de Investigación, Universidad Privada Franz Tamayo (UNIFRANZ), La Paz, Bolivia

## Current affiliation: Laboratório de Epidemiologia de Malformações Congênitas - Instituto Oswaldo Cruz/Fiocruz

§ in memoriam

| ID    | Gender | Age strata | Ethnicity | Monthly income | Education | Region  | Stage | Benz | BB | ACEi/ARB | Spirono | <b>ATGR1</b> |        |          |           | <b>ACE</b> I/D |
|-------|--------|------------|-----------|----------------|-----------|---------|-------|------|----|----------|---------|--------------|--------|----------|-----------|----------------|
|       |        |            |           |                |           |         |       |      |    |          |         | rs5186       | rs5182 | rs275653 | rs2131127 |                |
| BR 1  | F      | >45        | Mest      | 1              | 4         | NA      | B1    | N    | N  | N        | N       | AA           | CC     | CC       | AA        | II             |
| BR 2  | M      | >45        | Mest      | 1              | 4         | NA      | B1    | N    | N  | N        | N       | AA           | CT     | CC       | GG        | II             |
| BR 3  | F      | ≤45        | Black     | 1              | >4        | Mata    | B1    | Y    | Y  | N        | N       | NA           | NA     | NA       | NA        | II             |
| BR 4  | M      | >45        | White     | 2-4            | >4        | Mata    | C     | Y    | Y  | Y        | Y       | AA           | NA     | NA       | NA        | DI             |
| BR 5  | F      | >45        | NA        | 1              | 4         | Mata    | B1    | N    | N  | Y        | N       | AC           | TT     | CC       | GG        | DI             |
| BR 6  | M      | >45        | Mest      | 2-4            | 4         | Mata    | B1    | Y    | Y  | Y        | N       | AA           | TT     | CC       | GA        | DI             |
| BR 7  | M      | ≤45        | Black     | 1              | >4        | NA      | B1    | N    | N  | N        | N       | AC           | TT     | CT       | GA        | II             |
| BR 8  | F      | >45        | NA        | 1              | 4         | Mata    | B1    | N    | N  | N        | N       | AA           | TT     | CC       | GA        | DI             |
| BR 9  | M      | ≤45        | Mest      | 1              | 4         | Agreste | C     | N    | N  | Y        | Y       | AA           | CT     | CC       | GA        | DI             |
| BR 10 | M      | >45        | Black     | 1              | 4         | RM      | C     | N    | Y  | Y        | Y       | AA           | TT     | CT       | GG        | DD             |
| BR 11 | F      | >45        | White     | 1              | 4         | other   | C     | N    | N  | N        | N       | AC           | TT     | CC       | GA        | DI             |

|       |   |     |       |     |    |         |    |   |   |   |   |    |    |    |    |    |
|-------|---|-----|-------|-----|----|---------|----|---|---|---|---|----|----|----|----|----|
| BR 12 | F | >45 | Mest  | 1   | 4  | Mata    | B1 | N | N | N | N | AA | CT | CC | GA | DI |
| BR 13 | F | >45 | Mest  | 2-4 | 4  | Agreste | B1 | N | N | N | N | AA | CT | CT | AA | DI |
| BR 14 | M | >45 | Mest  | 2-4 | 4  | Mata    | A  | Y | Y | N | N | AC | CT | CT | AA | II |
| BR 15 | F | >45 | NA    | NA  | NA | NA      | C  | N | Y | Y | N | AC | TT | CC | GA | DD |
| BR 16 | F | >45 | Mest  | 1   | 4  | Agreste | C  | N | N | N | N | AA | CC | CC | GA | DD |
| BR 17 | F | ≤45 | Mest  | >5  | 4  | Mata    | B1 | N | N | N | N | AC | CT | CT | AA | DI |
| BR 18 | F | ≤45 | Black | 1   | 4  | Mata    | A  | N | N | N | N | AC | TT | CT | GA | DI |
| BR 19 | F | >45 | NA    | 1   | 4  | Mata    | B1 | N | N | N | N | AC | TT | CC | GG | DD |
| BR 20 | F | ≤45 | Mest  | NA  | 4  | Sertão  | B1 | N | N | N | N | AC | CT | CT | GA | DI |
| BR 21 | M | >45 | Mest  | 2-4 | 4  | Mata    | B1 | N | N | N | N | AC | TT | CT | GA | DD |
| BR 22 | F | >45 | Mest  | NA  | 4  | Agreste | B1 | N | N | Y | N | AC | TT | CC | GG | DI |
| BR 23 | M | >45 | Mest  | 1   | 4  | Mata    | C  | N | Y | Y | N | AC | CT | CC | GA | DI |
| BR 24 | F | >45 | NA    | >5  | >4 | Sertão  | B1 | Y | N | N | N | AC | TT | CC | GA | II |
| BR 25 | F | >45 | White | 1   | >4 | Mata    | B1 | N | N | N | N | AC | CT | CC | GA | DI |
| BR 26 | F | >45 | NA    | 1   | 4  | other   | A  | N | N | N | N | AC | TT | CT | GA | DD |
| BR 27 | F | >45 | Mest  | 1   | 4  | Agreste | C  | N | N | N | N | AA | CT | CC | AA | II |
| BR 28 | F | >45 | Mest  | <2  | >4 | Sertão  | B1 | N | N | N | N | AA | TT | CC | GG | DI |
| BR 29 | M | >45 | Mest  | 1   | 4  | Mata    | C  | N | N | N | N | NA | TT | CT | AA | DD |
| BR 30 | F | >45 | White | 1   | 4  | Sertão  | B1 | Y | N | N | N | AA | CT | CC | GA | DI |
| BR 31 | F | >45 | NA    | 1   | >4 | Mata    | B1 | N | N | N | N | AC | CT | CT | GA | DI |
| BR 32 | M | >45 | Black | 1   | 4  | other   | C  | N | Y | Y | N | AA | CC | CC | AA | DI |
| BR 33 | M | ≤45 | Mest  | 1   | >4 | Sertão  | A  | N | N | N | N | AC | TT | CC | GA | II |
| BR 34 | F | >45 | Mest  | 1   | >4 | other   | B1 | N | N | N | N | AA | CC | CC | GA | II |
| BR 35 | F | >45 | Mest  | 1   | 4  | Mata    | B1 | N | N | Y | N | AA | CC | CC | AA | II |
| BR 36 | F | >45 | Mest  | 1   | 4  | Mata    | B1 | N | N | N | N | AA | CT | CC | GA | DI |
| BR 37 | F | >45 | Black | 1   | 4  | Mata    | B1 | N | N | Y | N | AA | CT | CC | GA | DI |
| BR 38 | F | >45 | Mest  | <1  | 4  | Mata    | B1 | N | N | Y | N | AC | CT | CT | AA | DI |
| BR 39 | F | >45 | White | 1   | 4  | Mata    | B1 | N | N | N | N | AC | TT | CC | GA | DI |
| BR 40 | M | >45 | Mest  | NA  | 4  | Mata    | C  | N | N | N | N | AC | TT | CC | GG | DI |
| BR 41 | F | >45 | Mest  | 1   | 4  | Mata    | B1 | N | N | N | N | AA | CC | CC | GG | II |
| BR 42 | M | >45 | Black | <1  | 4  | Mata    | B1 | N | N | N | N | AA | TT | CT | GA | DD |
| BR 43 | F | >45 | White | 2-4 | >4 | Mata    | B1 | N | N | N | N | AC | CT | CT | AA | II |
| BR 44 | F | >45 | White | 1   | 4  | Mata    | B1 | N | N | N | N | AA | TT | TT | GG | DD |

|       |   |     |       |     |    |         |    |   |   |   |   |    |    |    |    |    |
|-------|---|-----|-------|-----|----|---------|----|---|---|---|---|----|----|----|----|----|
| BR 45 | M | ≤45 | Mest  | 1   | 4  | other   | B1 | N | N | N | N | AC | CT | CC | GG | DD |
| BR 46 | F | >45 | NA    | <1  | 4  | Sertão  | B1 | N | Y | Y | N | AA | CT | CC | GA | DI |
| BR 47 | F | >45 | Mest  | 1   | 4  | Sertão  | B1 | N | N | N | N | AC | CT | CT | GA | DI |
| BR 48 | M | ≤45 | Black | 1   | >4 | RM      | A  | N | N | N | N | AA | CT | CC | GG | II |
| BR 49 | F | ≤45 | NA    | 1   | >4 | Sertão  | B1 | Y | N | N | N | AA | CT | CC | GA | DD |
| BR 50 | F | >45 | Mest  | 1   | >4 | NA      | C  | N | Y | Y | N | AA | CT | CC | GA | DD |
| BR 51 | F | >45 | Mest  | 1   | 4  | Mata    | B1 | N | N | N | N | AA | CT | TT | GA | DI |
| BR 52 | F | >45 | Black | >5  | 4  | Agreste | C  | N | N | N | Y | AA | TT | CC | GG | DI |
| BR 53 | M | >45 | Mest  | 1   | 4  | Mata    | C  | N | N | N | N | AA | CT | TT | AA | DD |
| BR 54 | F | >45 | Mest  | 1   | 4  | Mata    | B1 | N | N | N | N | AA | TT | CC | GG | DD |
| BR 55 | M | >45 | Black | 1   | 4  | Mata    | C  | N | Y | Y | Y | AA | CT | CT | AA | DD |
| BR 56 | M | >45 | NA    | 1   | 4  | Agreste | B1 | N | N | N | N | AA | TT | CC | AA | DI |
| BR 57 | F | >45 | Mest  | 1   | 4  | Agreste | A  | N | N | N | N | AC | TT | CT | AA | DI |
| BR 58 | F | >45 | NA    | 1   | 4  | Sertão  | A  | Y | Y | N | Y | AC | CT | CC | GA | DD |
| BR 59 | M | >45 | Mest  | 1   | >4 | Agreste | A  | N | N | N | N | AC | CT | CC | AA | DI |
| BR 60 | F | >45 | Mest  | 1-2 | >4 | Sertão  | B1 | N | N | N | N | AC | TT | CC | AA | DI |
| BR 61 | M | >45 | Mest  | 2-4 | >4 | Sertão  | C  | N | N | N | N | AA | CT | CT | AA | DI |
| BR 62 | M | >45 | Mest  | 1   | 4  | Sertão  | B1 | N | N | N | N | AA | CT | CT | GA | DI |
| BR 63 | F | >45 | Mest  | 1   | 4  | Mata    | C  | N | N | N | N | AA | CT | CT | GA | DD |
| BR 64 | F | >45 | Mest  | <1  | 4  | Sertão  | C  | N | N | N | N | AA | CT | CT | GA | DD |
| BR 65 | F | >45 | Mest  | 1   | 4  | Sertão  | C  | Y | N | N | N | AA | CC | CC | AA | II |
| BR 66 | F | >45 | NA    | 1   | 4  | NA      | B1 | N | N | N | N | NA | TT | CT | AA | DD |
| BR 67 | F | >45 | NA    | NA  | NA | NA      | C  | N | N | N | N | AA | CC | CT | GA | DI |
| BR 68 | F | >45 | Mest  | 1   | 4  | Sertão  | B1 | N | N | N | N | AA | TT | CT | GA | DI |
| BR 69 | F | >45 | White | 1   | 4  | Sertão  | C  | N | N | N | N | AA | CC | CC | GA | II |
| BR 70 | F | >45 | White | 1   | >4 | Mata    | B1 | N | N | N | N | AC | CT | CT | AA | II |
| BR 71 | M | >45 | White | 1   | 4  | Agreste | A  | N | N | N | N | AA | CC | CC | GG | DI |
| BR 72 | F | >45 | Mest  | 1   | 4  | Mata    | B1 | N | N | N | N | AA | CT | CT | GG | DI |
| BR 73 | M | >45 | Black | >5  | 4  | Sertão  | C  | Y | Y | Y | N | AA | TT | CC | GG | DD |
| BR 74 | F | >45 | White | 1   | 4  | Mata    | A  | N | N | N | N | AC | CT | CC | AA | DD |
| BR 75 | F | >45 | Black | >5  | 4  | Mata    | C  | N | Y | Y | Y | AA | TT | CT | AA | DI |
| BR 76 | M | ≤45 | Mest  | 1   | 4  | Mata    | C  | N | Y | Y | N | AA | CT | CC | GA | DD |
| BR 77 | F | ≤45 | Mest  | 1   | 4  | Agreste | B1 | Y | Y | N | N | AA | CT | CT | GA | DI |

|        |   |     |       |     |    |         |    |   |   |   |   |    |    |    |    |    |
|--------|---|-----|-------|-----|----|---------|----|---|---|---|---|----|----|----|----|----|
| BR 78  | F | >45 | Mest  | NA  | 4  | Agreste | C  | N | N | N | N | NA | NA | NA | NA | DI |
| BR 79  | F | >45 | Mest  | 1   | 4  | Mata    | B1 | Y | N | N | N | AC | CT | CT | AA | DD |
| BR 80  | F | >45 | Mest  | 1   | 4  | Agreste | B1 | N | N | Y | N | AC | CT | CC | GA | DD |
| BR 81  | F | >45 | Mest  | 1   | 4  | Mata    | B1 | N | Y | Y | N | AC | TT | CC | GA | DI |
| BR 82  | F | >45 | Mest  | 1   | 4  | Mata    | B1 | N | N | N | N | AC | CT | CC | GA | DI |
| BR 83  | F | >45 | White | 2-4 | >4 | NA      | B1 | Y | N | N | N | AA | CT | CC | GA | NA |
| BR 84  | F | >45 | Mest  | 1   | >4 | Sertão  | C  | Y | N | N | N | AA | CT | CC | GA | II |
| BR 85  | F | >45 | Mest  | NA  | 4  | Mata    | B1 | N | N | Y | N | AA | TT | CT | GG | II |
| BR 86  | F | ≤45 | Mest  | <1  | 4  | Mata    | B1 | N | N | N | N | AA | CT | CC | GG | II |
| BR 87  | M | >45 | NA    | 1   | 4  | Mata    | B1 | N | Y | N | N | AA | TT | CC | GA | DI |
| BR 88  | M | >45 | White | >5  | 4  | Agreste | A  | Y | N | Y | N | AC | CT | CC | AA | DI |
| BR 89  | F | ≤45 | Mest  | >5  | 4  | other   | A  | N | N | N | N | AA | CT | CC | GA | II |
| BR 90  | F | >45 | White | NA  | >4 | Agreste | B1 | N | Y | Y | N | AA | CT | CT | GA | DD |
| BR 91  | F | >45 | White | 2   | 4  | Agreste | C  | N | Y | Y | N | AA | CT | CC | GA | DI |
| BR 92  | F | >45 | Mest  | >5  | 4  | other   | B1 | N | N | N | N | AC | TT | CC | AA | DD |
| BR 93  | F | >45 | Mest  | 1   | 4  | Mata    | B1 | N | N | N | N | AA | TT | CT | GA | DD |
| BR 94  | F | ≤45 | Mest  | NA  | 4  | Mata    | C  | N | N | N | N | AA | TT | CT | AA | DI |
| BR 95  | F | >45 | Mest  | 1   | 4  | other   | C  | N | N | Y | N | AC | TT | CC | GA | DD |
| BR 96  | M | >45 | White | 1   | 4  | Sertão  | A  | N | N | N | N | AC | TT | CC | AA | DD |
| BR 97  | F | >45 | Black | NA  | >4 | Mata    | B1 | N | Y | N | N | AA | CT | CC | GA | DI |
| BR 98  | F | >45 | Mest  | 1   | 4  | Sertão  | B1 | N | Y | Y | N | AC | TT | CC | GG | DD |
| BR 99  | M | >45 | White | 1   | 4  | other   | C  | N | Y | Y | N | AA | CT | CT | GA | II |
| BR 100 | F | >45 | Mest  | NA  | 4  | NA      | B1 | N | N | N | N | AC | TT | CT | GA | II |
| BR 101 | M | >45 | Mest  | 1   | 4  | Mata    | B1 | N | N | Y | N | AA | CC | CC | AA | DI |
| BR 102 | F | >45 | Mest  | >5  | 4  | other   | A  | N | N | N | N | AC | TT | CT | AA | DI |
| BR 103 | F | >45 | White | 1   | 4  | other   | B1 | N | N | N | N | AC | TT | CC | GA | DD |
| BR 104 | F | >45 | Mest  | 1   | 4  | Mata    | C  | N | N | N | N | AA | CT | CT | GA | DD |
| BR 105 | F | >45 | Mest  | >5  | 4  | other   | B1 | N | N | N | N | AC | CT | CC | AA | DI |
| BR 106 | F | >45 | Mest  | 1   | >4 | Mata    | B1 | N | N | N | N | AC | TT | CC | GG | II |
| BR 107 | M | ≤45 | Mest  | 1   | 4  | Mata    | C  | N | N | N | N | AA | CT | CC | GA | DI |
| BR 108 | M | >45 | Mest  | 1   | 4  | other   | A  | N | N | Y | N | AA | CT | CC | AA | DD |
| BR 109 | M | >45 | Mest  | 1   | 4  | Agreste | A  | N | N | N | N | AA | CT | CT | GA | DD |
| BR 110 | F | >45 | Mest  | 1   | 4  | Mata    | B1 | N | N | N | N | AA | CT | CT | GA | DI |

|        |   |     |       |     |    |         |    |   |   |   |   |    |    |    |    |    |
|--------|---|-----|-------|-----|----|---------|----|---|---|---|---|----|----|----|----|----|
| BR 111 | F | >45 | White | 1   | >4 | other   | B1 | N | N | N | N | AA | CT | CC | GA | DI |
| BR 112 | M | >45 | Mest  | 1   | >4 | other   | B1 | N | N | N | N | AA | TT | CC | GG | DI |
| BR 113 | F | >45 | Black | 1   | 4  | Mata    | B1 | N | N | N | N | AC | TT | CC | GG | DD |
| BR 114 | F | >45 | Mest  | 1   | >4 | Sertão  | B1 | Y | Y | Y | N | AA | CT | CC | GA | DI |
| BR 115 | F | >45 | White | 1   | 4  | Agreste | B1 | Y | N | N | N | AC | CT | CC | AA | II |
| BR 116 | F | >45 | Mest  | NA  | 4  | Sertão  | B1 | N | Y | N | N | AA | CT | CC | GA | DI |
| BR 117 | F | ≤45 | Mest  | NA  | 4  | Sertão  | B1 | N | N | N | N | AA | CT | CT | GA | II |
| BR 118 | M | >45 | White | 2-4 | 4  | Sertão  | A  | N | Y | N | N | AA | CC | CT | GA | II |
| BR 119 | M | >45 | Black | 1   | 4  | NA      | C  | N | N | Y | N | AC | CT | CT | AA | II |
| BR 120 | M | >45 | Black | 1   | 4  | Agreste | C  | Y | Y | Y | Y | AA | TT | CT | GA | DD |
| BR 121 | M | >45 | Mest  | NA  | 4  | Agreste | C  | N | N | Y | Y | AA | CT | CC | GA | DI |
| BR 122 | F | ≤45 | NA    | 1   | 4  | Mata    | C  | Y | Y | Y | Y | AC | TT | CC | GA | DI |
| BR 123 | M | >45 | Mest  | NA  | 4  | NA      | C  | N | N | N | N | AA | CC | CC | GG | DD |
| BR 124 | M | >45 | White | 1   | 4  | Agreste | C  | N | Y | Y | N | AC | TT | TT | AA | II |
| BR 125 | F | >45 | NA    | 1   | 4  | Agreste | C  | N | Y | Y | N | AC | CT | TT | AA | DI |
| BR 126 | F | >45 | Mest  | NA  | 4  | Mata    | B1 | N | N | Y | N | AC | TT | CC | GA | DI |
| BR 127 | F | >45 | Mest  | 1   | 4  | Mata    | B1 | N | Y | N | N | AC | TT | TT | GA | II |
| BR 128 | F | >45 | Mest  | 1   | 4  | RM      | B1 | N | N | Y | N | AA | CT | CT | GA | DI |
| BR 129 | F | >45 | Mest  | 1   | 4  | Other   | C  | Y | N | N | N | AA | CC | CC | AA | DI |
| BR 130 | M | >45 | Mest  | 1   | 4  | Mata    | B1 | N | N | Y | N | AC | TT | CC | GG | II |
| BR 131 | F | >45 | White | >5  | 4  | Sertão  | A  | Y | Y | N | N | AA | CC | CC | GA | DD |
| BR 132 | F | >45 | Mest  | >5  | 4  | other   | B1 | N | N | Y | N | AC | TT | CT | GA | DD |
| BR 133 | M | >45 | Mest  | 1   | 4  | other   | C  | N | Y | Y | Y | AC | CT | CC | AA | II |
| BR 134 | M | >45 | White | 1   | 4  | Sertão  | B1 | Y | N | Y | N | AA | CT | CC | GA | DI |
| BR 135 | F | >45 | White | >5  | 4  | Agreste | A  | Y | Y | Y | N | AA | CT | CC | GG | DI |
| BR 136 | M | >45 | NA    | 1   | 4  | Mata    | C  | N | N | N | N | AC | TT | CT | GA | DI |
| BR 137 | M | >45 | Mest  | 1   | 4  | other   | A  | N | N | N | N | AA | TT | CC | GG | DI |
| BR 138 | F | >45 | Black | >5  | 4  | other   | A  | N | N | N | N | AC | TT | CC | AA | DI |
| BR 139 | F | ≤45 | Mest  | >5  | 4  | Sertão  | A  | Y | N | N | N | AC | TT | CT | GA | DI |
| BR 140 | F | >45 | Mest  | NA  | >4 | Agreste | B1 | N | N | N | N | AA | TT | CT | AA | DI |
| BR 141 | M | >45 | NA    | 1   | 4  | Agreste | C  | N | Y | Y | N | AA | CT | CC | GG | DI |
| BR 142 | F | >45 | Mest  | 1   | 4  | Sertão  | B1 | Y | N | N | N | AA | CC | CC | GA | DD |
| BR 143 | F | >45 | Mest  | 1   | 4  | other   | B1 | N | N | N | N | AA | CT | CC | GA | DD |

|        |   |     |       |     |    |         |    |   |   |   |   |    |    |    |    |    |
|--------|---|-----|-------|-----|----|---------|----|---|---|---|---|----|----|----|----|----|
| BR 144 | F | ≤45 | Mest  | <1  | 4  | Agreste | B1 | N | N | N | N | AC | TT | CC | GA | DI |
| BR 145 | F | ≤45 | Mest  | 1   | 4  | other   | C  | N | Y | Y | Y | AA | CC | CC | GA | II |
| BR 146 | F | >45 | Mest  | 1   | 4  | Mata    | B1 | Y | N | Y | N | AA | TT | CC | GG | II |
| BR 147 | M | >45 | Mest  | 1   | 4  | Other   | B1 | N | N | Y | N | AA | CC | CC | GA | DI |
| BR 148 | F | >45 | Mest  | 1   | >4 | NA      | C  | N | Y | Y | N | AC | CT | CT | AA | II |
| BR 149 | F | >45 | Black | 1   | 4  | Mata    | B1 | N | N | Y | N | AC | TT | CC | GA | DD |
| BR 150 | F | >45 | Mest  | 2-4 | 4  | Sertão  | C  | N | N | N | N | AC | CT | CC | GA | DD |
| BR 151 | M | >45 | Mest  | 1   | 4  | Agreste | C  | N | Y | Y | Y | AC | CT | CC | GA | DI |
| BR 152 | F | >45 | Mest  | >5  | 4  | other   | C  | N | Y | Y | Y | AA | CT | CC | AA | DI |
| BR 153 | F | >45 | Mest  | 1   | 4  | other   | C  | N | Y | Y | N | AA | TT | CT | GA | DI |
| BR 154 | M | >45 | Mest  | 1   | 4  | Agreste | C  | N | N | N | N | AA | TT | CT | GA | DI |
| BR 155 | F | >45 | White | >5  | 4  | Agreste | C  | N | Y | Y | Y | AA | CC | CC | GA | DI |
| BR 156 | F | >45 | Mest  | 1   | 4  | Mata    | C  | N | Y | Y | Y | NA | NA | NA | NA | DD |
| BR 157 | F | >45 | White | 1   | 4  | Mata    | C  | N | N | Y | N | AA | NA | NA | NA | DD |
| BR 158 | F | >45 | Mest  | 1   | 4  | Mata    | C  | N | Y | Y | Y | AC | TT | CC | GA | DI |
| BR 159 | F | >45 | Mest  | 1   | 4  | RM      | C  | N | Y | Y | Y | AA | CT | CT | GG | DD |
| BR 160 | M | >45 | White | 1   | 4  | Mata    | B1 | N | N | Y | N | AC | TT | CT | GA | DI |
| BR 161 | M | >45 | White | 1   | >4 | Agreste | C  | N | Y | Y | Y | AA | CT | CT | GA | DI |
| BR 162 | M | >45 | Mest  | 1   | 4  | Mata    | C  | N | Y | Y | N | AA | CT | CT | AA | DD |
| BR 163 | F | >45 | Mest  | 1   | 4  | Mata    | C  | N | Y | Y | N | NA | NA | NA | NA | DI |
| BR 164 | M | >45 | Mest  | 1   | 4  | Agreste | C  | N | Y | Y | Y | AA | CC | CC | AA | DI |
| BR 165 | M | >45 | Mest  | 1   | 4  | Mata    | C  | N | Y | Y | Y | AA | CT | CC | GG | DD |
| BR 166 | M | >45 | Mest  | 1   | 4  | Agreste | C  | N | N | Y | Y | AC | CT | CC | GG | DI |
| BR 167 | M | >45 | NA    | NA  | NA | NA      | C  | N | Y | Y | Y | AA | TT | CT | GA | DI |
| BR 168 | M | >45 | Mest  | 1   | 4  | Agreste | B1 | N | N | N | N | AC | TT | CT | AA | II |
| BR 169 | F | >45 | Black | NA  | 4  | Mata    | B1 | N | N | N | N | AC | TT | CT | GA | DI |
| BR 170 | M | ≤45 | Mest  | NA  | 4  | RM      | B1 | N | N | N | N | AC | TT | CT | GA | DD |
| BR 171 | F | >45 | Mest  | 2-4 | 4  | Sertão  | B1 | N | N | N | N | AA | CC | CT | AA | DI |
| BR 172 | M | >45 | White | NA  | 4  | Agreste | A  | N | N | N | N | AA | CC | CT | GA | DI |
| BR 173 | F | >45 | Mest  | 1   | NA | NA      | C  | N | N | N | N | AA | CT | CC | GA | DD |
| BR 174 | M | >45 | Mest  | 1   | NA | Agreste | C  | N | Y | Y | Y | AA | CT | CC | GA | DI |
| BR 175 | M | >45 | Mest  | 1   | 4  | Mata    | B1 | N | N | Y | N | AA | TT | CT | GA | II |
| BR 176 | F | >45 | Mest  | 1   | 4  | Sertão  | B1 | N | N | Y | N | AA | CT | CC | GG | DI |

|        |   |     |       |     |    |         |    |   |   |   |   |    |    |    |    |    |
|--------|---|-----|-------|-----|----|---------|----|---|---|---|---|----|----|----|----|----|
| BR 177 | F | >45 | Mest  | 1   | 4  | Mata    | A  | N | N | Y | N | AC | TT | CC | GA | DI |
| BR 178 | F | >45 | Mest  | 1   | 4  | Mata    | C  | N | N | N | N | AC | CT | CT | GA | DD |
| BR 179 | F | ≤45 | White | 1   | 4  | Mata    | B1 | Y | N | N | N | AC | TT | CT | GG | DD |
| BR 180 | F | >45 | Mest  | >5  | 4  | other   | A  | N | N | Y | N | AA | TT | CT | GA | II |
| BR 181 | F | >45 | Mest  | 1   | 4  | Mata    | B1 | N | N | N | N | AC | TT | NA | GA | DD |
| BR 182 | F | >45 | White | 1   | 4  | Agreste | C  | N | Y | Y | Y | AC | CT | CC | GA | II |
| BR 183 | F | >45 | Mest  | 1   | 4  | NA      | C  | N | Y | N | N | AC | TT | CT | GA | DD |
| BR 184 | M | ≤45 | Mest  | 1   | 4  | Agreste | B1 | N | N | N | N | AC | TT | CT | AA | DD |
| BR 185 | F | >45 | Mest  | 1   | 4  | other   | B1 | N | N | Y | N | AA | TT | TT | GG | DI |
| BR 186 | F | >45 | Mest  | NA  | NA | other   | B1 | N | N | N | N | AA | CT | CC | GA | DD |
| BR 187 | F | >45 | Mest  | NA  | >4 | RM      | B1 | N | N | N | N | AA | CT | NA | NA | DD |
| BR 188 | F | >45 | Mest  | 1   | 4  | Agreste | B1 | N | N | N | N | AA | CC | CC | AA | DD |
| BR 189 | F | ≤45 | Mest  | 2-4 | >4 | RM      | B1 | N | N | N | N | AC | CT | TT | AA | DD |
| BR 190 | F | >45 | Mest  | NA  | NA | Mata    | B1 | N | N | N | N | AC | TT | CT | GA | DI |
| BR 191 | F | >45 | White | 1   | 4  | Agreste | C  | N | Y | Y | Y | AC | TT | CC | GA | DI |
| BR 192 | F | >45 | Mest  | 1   | NA | Sertão  | B1 | N | N | Y | N | AC | TT | CC | GA | DD |
| BR 193 | M | >45 | Mest  | 1   | 4  | Agreste | C  | N | Y | Y | Y | AA | TT | CT | GA | DI |
| BR 194 | F | >45 | White | 1   | 4  | Sertão  | B1 | Y | N | N | N | AC | TT | CT | GA | DI |
| BR 195 | F | >45 | Mest  | 1   | 4  | Mata    | B1 | N | N | N | N | AA | TT | CT | GA | DI |
| BR 196 | M | >45 | Mest  | 1   | 4  | Mata    | B1 | N | N | Y | N | AA | CT | CC | GG | DI |
| BR 197 | M | >45 | Mest  | 1   | 4  | Agreste | B1 | N | N | N | N | AA | TT | CT | GA | DD |
| BR 198 | F | >45 | NA    | 1   | 4  | Mata    | B1 | N | Y | Y | N | AA | TT | CC | NA | DD |
| BR 199 | M | ≤45 | Black | 1-2 | 4  | RM      | B1 | N | N | N | N | AA | CT | CT | GA | DI |
| BR 200 | M | >45 | White | 1   | 4  | Mata    | C  | N | Y | N | Y | AA | CT | CC | GA | DI |
| BR 201 | F | >45 | Mest  | 1   | 4  | Sertão  | C  | N | Y | Y | Y | AA | CC | CC | GA | II |
| BR 202 | F | >45 | White | 2-4 | 4  | Mata    | B1 | N | N | Y | N | AC | TT | CT | AA | DD |
| BR 203 | F | >45 | Mest  | 1   | 4  | Mata    | C  | N | N | N | N | AC | TT | CT | GA | NA |
| BR 204 | F | >45 | Mest  | 1   | 4  | Sertão  | C  | N | Y | Y | Y | AC | TT | CC | GA | DI |
| BR 205 | F | >45 | Mest  | 1   | 4  | Agreste | B1 | N | N | Y | N | AC | TT | TT | AA | DD |
| BR 206 | F | >45 | Mest  | NA  | 4  | Agreste | A  | N | N | N | N | AA | CC | CT | AA | DD |
| BR 207 | F | >45 | Black | 1   | 4  | Mata    | B1 | N | N | N | N | AC | CT | CT | GA | DI |
| BR 208 | F | >45 | Mest  | NA  | 4  | Mata    | C  | N | Y | Y | N | AC | CT | CC | GG | DD |
| BR 209 | F | ≤45 | Mest  | >5  | 4  | other   | A  | N | N | N | N | AA | CT | CC | GA | DD |

|        |   |     |       |     |    |         |    |   |   |   |   |    |    |    |    |    |
|--------|---|-----|-------|-----|----|---------|----|---|---|---|---|----|----|----|----|----|
| BR 210 | F | >45 | Mest  | 1   | 4  | Mata    | B1 | N | Y | Y | N | AC | TT | CT | GA | DI |
| BR 211 | F | >45 | White | 1   | 4  | Sertão  | B1 | N | N | N | N | AA | TT | CC | GG | II |
| BR 212 | M | ≤45 | Mest  | 2-4 | 4  | Agreste | B1 | N | N | N | N | AC | TT | CT | GA | DI |
| BR 213 | F | >45 | White | <1  | 4  | Sertão  | C  | N | Y | Y | Y | AA | CT | CC | GA | DI |
| BR 214 | F | >45 | Mest  | 2-4 | 4  | Mata    | A  | Y | Y | Y | N | AA | TT | CT | AA | DD |
| BR 215 | F | >45 | Mest  | 1   | 4  | Agreste | A  | N | N | N | N | AA | CT | CT | GA | DD |
| BR 216 | F | >45 | Mest  | 1   | 4  | Mata    | C  | N | N | N | N | AA | CT | CC | GA | DD |
| BR 217 | F | ≤45 | NA    | >5  | >4 | RM      | C  | Y | Y | Y | N | AA | TT | CT | GA | DI |
| BR 218 | F | >45 | Mest  | NA  | NA | Mata    | B1 | N | N | N | N | AA | TT | CC | GA | DD |
| BR 219 | M | ≤45 | NA    | NA  | NA | NA      | C  | Y | Y | Y | Y | AC | CT | CT | GA | DD |
| BR 220 | M | >45 | Mest  | NA  | NA | Agreste | C  | N | Y | Y | Y | AA | CT | CC | GG | DI |
| BR 221 | F | >45 | Mest  | <1  | NA | Mata    | C  | N | N | N | N | AC | CT | CC | GA | DD |
| BR 222 | F | >45 | NA    | 1   | NA | Mata    | C  | Y | N | Y | N | AA | CT | TT | AA | DD |
| BR 223 | F | >45 | NA    | 1   | 4  | Mata    | C  | N | Y | Y | Y | AA | CC | CC | GA | DD |
| BR 224 | F | >45 | Mest  | 1   | 4  | Mata    | B1 | N | N | Y | N | AC | TT | CT | GA | DI |
| BR 225 | F | >45 | Mest  | 1   | >4 | RM      | B1 | N | Y | N | N | AA | TT | CC | GG | DI |
| BR 226 | F | >45 | Mest  | 1   | 4  | Mata    | B1 | N | N | N | N | AC | TT | CC | GA | DD |
| BR 227 | F | >45 | Mest  | NA  | 4  | Mata    | C  | N | N | Y | Y | AA | TT | CC | GA | DD |
| BR 228 | F | ≤45 | Black | >5  | 4  | Sertão  | A  | Y | N | N | N | AC | TT | CC | GA | DD |
| BR 229 | F | >45 | Mest  | 1   | 4  | Mata    | C  | N | Y | N | Y | AC | TT | CT | AA | DI |
| BR 230 | F | >45 | Black | 1   | 4  | Mata    | C  | N | Y | Y | N | AA | TT | CC | GG | II |
| BR 231 | M | >45 | Mest  | 2-4 | 4  | NA      | C  | N | Y | Y | Y | AA | CT | CC | AA | DD |
| BR 232 | M | >45 | Mest  | 1   | 4  | Agreste | C  | N | Y | Y | Y | AA | TT | CC | GG | DI |
| BR 233 | M | >45 | White | 1   | 4  | Sertão  | C  | Y | Y | Y | Y | AA | CC | CC | GA | DI |
| BR 234 | F | >45 | White | 1   | 4  | Mata    | B1 | N | Y | N | N | AA | CT | CT | GA | DI |
| BR 235 | F | >45 | Mest  | 1   | 4  | Sertão  | B1 | N | Y | Y | N | AC | CT | CT | GA | DD |
| BR 236 | F | ≤45 | Mest  | >5  | 4  | other   | A  | Y | N | N | N | AC | TT | CT | GA | II |
| BR 237 | F | >45 | Mest  | 1   | 4  | Sertão  | B1 | N | Y | N | N | AA | CT | CT | AA | DD |
| BR 238 | F | >45 | Mest  | 1   | >4 | other   | C  | N | N | N | N | AA | CC | CT | GA | DI |
| BR 239 | M | >45 | Mest  | NA  | NA | Sertão  | A  | N | N | N | N | AC | TT | CC | AA | DD |
| BR 240 | F | >45 | Mest  | NA  | 4  | Agreste | B1 | N | N | N | N | AC | TT | CC | AA | DD |
| BR 241 | F | >45 | White | 1   | 4  | other   | A  | N | N | N | N | AA | CT | CT | AA | DI |
| BR 242 | F | >45 | NA    | NA  | 4  | Agreste | A  | Y | N | N | N | AA | CT | CT | AA | II |



|        |   |     |       |     |    |         |    |   |   |   |   |    |    |    |    |    |
|--------|---|-----|-------|-----|----|---------|----|---|---|---|---|----|----|----|----|----|
| BR 243 | M | ≤45 | White | 1   | 4  | Sertão  | C  | N | N | N | N | NA | CC | CC | AA | DI |
| BR 244 | M | ≤45 | NA    | NA  | NA | Sertão  | B1 | N | N | N | N | AC | CT | CC | GA | II |
| BR 245 | F | >45 | NA    | NA  | NA | Mata    | B1 | N | N | N | N | AA | TT | CC | GG | DD |
| BR 246 | F | >45 | Mest  | 2-4 | NA | Agreste | B1 | Y | N | Y | N | AA | CC | CC | AA | NA |
| BR 247 | F | >45 | White | NA  | 4  | Mata    | B1 | N | N | N | N | AC | TT | CC | GG | DI |
| BR 248 | F | >45 | White | NA  | NA | Mata    | B1 | N | N | N | N | AA | CT | TT | AA | DI |
| BR 249 | F | ≤45 | Mest  | 1   | >4 | Mata    | B1 | N | N | N | N | AC | TT | TT | GA | DD |
| BR 250 | F | >45 | White | 1   | >4 | Agreste | A  | Y | N | N | N | AC | CT | CC | GA | DD |
| BR 251 | F | >45 | Mest  | 1   | 4  | Agreste | B1 | N | N | N | N | AA | TT | CT | GG | II |
| BR 252 | M | ≤45 | White | NA  | 4  | Sertão  | B1 | N | N | N | N | AC | CT | CC | GA | II |
| BR 253 | M | >45 | Mest  | 1   | 4  | Mata    | C  | N | N | N | N | AA | TT | CC | GA | DD |
| BR 254 | F | >45 | White | 1   | 4  | Agreste | C  | N | Y | N | N | AC | TT | CT | AA | DD |
| BR 255 | M | ≤45 | Mest  | NA  | 4  | Sertão  | B1 | Y | N | Y | N | AC | TT | CT | AA | DI |
| BR 256 | F | >45 | Mest  | 1   | 4  | Mata    | B1 | N | N | Y | N | AA | TT | CC | GA | DI |
| BR 257 | M | >45 | Mest  | 2-4 | >4 | other   | C  | N | N | N | N | AA | CT | CC | GG | DD |
| BR 258 | M | >45 | Mest  | 1   | 4  | Mata    | B1 | N | N | N | N | AA | CC | CC | GA | DI |
| BR 259 | F | >45 | Mest  | >5  | >4 | NA      | A  | Y | N | N | N | AA | CT | CC | GA | DI |
| BR 260 | F | ≤45 | Black | 1   | 4  | RM      | C  | N | Y | Y | Y | AA | CT | CT | GG | II |
| BR 261 | F | >45 | Mest  | 2-4 | 4  | NA      | B1 | N | N | N | N | AA | CC | CC | NA | NA |
| BR 262 | F | >45 | Mest  | NA  | 4  | Mata    | C  | N | N | N | N | AC | TT | CT | GG | DD |
| BR 263 | F | >45 | Mest  | NA  | 4  | Mata    | C  | N | N | N | N | AA | CC | CC | GA | DI |
| BR 264 | M | >45 | Mest  | >5  | >4 | other   | A  | N | N | N | N | AA | CT | CT | GA | II |
| BR 265 | M | >45 | Black | 1   | 4  | other   | A  | Y | N | Y | N | AC | CT | CC | AA | DI |
| BR 266 | M | >45 | Mest  | 1   | 4  | Agreste | A  | N | N | N | N | AA | CT | CT | AA | II |
| BR 267 | F | ≤45 | Mest  | 1   | >4 | Mata    | B1 | N | N | N | N | AA | CT | CC | GG | NA |
| BR 268 | F | >45 | Mest  | 1   | 4  | Mata    | C  | N | N | N | N | AC | TT | CC | AA | NA |
| BR 269 | M | >45 | Mest  | 1   | 4  | Mata    | C  | N | Y | Y | Y | AA | CT | CC | GG | DD |
| BR 270 | F | >45 | White | 1   | 4  | Mata    | B1 | N | Y | Y | N | AA | CT | CT | GA | NA |
| BR 271 | F | >45 | Mest  | NA  | NA | Agreste | C  | N | N | Y | Y | AA | CT | CC | GG | II |
| BR 272 | M | >45 | White | 2-4 | 4  | Agreste | C  | N | N | N | N | AA | CT | CC | GG | DI |
| BR 273 | M | >45 | NA    | 2-4 | >4 | Mata    | B1 | N | Y | N | N | AA | CT | CT | AA | DI |
| BR 274 | F | ≤45 | Mest  | 1   | >4 | Sertão  | C  | N | Y | Y | Y | AA | CC | CC | GA | NA |
| BR 275 | F | >45 | Mest  | 1   | 4  | Mata    | B1 | N | N | N | N | NA | TT | NA | NA | NA |

|        |   |     |       |     |    |         |    |   |   |   |   |    |    |    |    |    |
|--------|---|-----|-------|-----|----|---------|----|---|---|---|---|----|----|----|----|----|
| BR 276 | F | >45 | NA    | 2-4 | 4  | Mata    | C  | N | Y | Y | Y | AC | TT | CC | AA | DI |
| BR 277 | F | >45 | Mest  | 1   | 4  | Mata    | B1 | N | N | N | N | AA | TT | CT | GA | NA |
| BR 278 | F | >45 | NA    | >5  | >4 | Sertão  | A  | Y | N | N | N | AA | CC | NA | GA | DI |
| BR 279 | F | >45 | Mest  | 1   | 4  | Agreste | A  | N | N | N | N | AA | TT | CC | AA | DD |
| BR 280 | F | >45 | Black | 1   | >4 | RM      | B1 | N | N | N | N | AC | CT | CC | AA | DI |
| BR 281 | F | >45 | NA    | 1   | 4  | Agreste | C  | N | N | N | N | AA | CC | CC | GA | DD |
| BR 282 | F | >45 | White | 2-4 | >4 | NA      | B1 | N | N | N | N | AA | CT | TT | AA | DD |
| BR 283 | M | >45 | Mest  | 1   | 4  | Sertão  | A  | N | N | N | N | AC | TT | CT | GG | DD |
| BR 284 | M | >45 | White | 2-4 | >4 | other   | C  | N | N | N | N | AA | CT | CC | AA | DI |
| BR 285 | M | >45 | White | 2-4 | 4  | Mata    | C  | N | N | N | N | AA | TT | CT | GG | DI |
| BR 286 | F | >45 | White | NA  | 4  | Mata    | A  | N | N | N | N | NA | NA | NA | NA | DI |
| BR 287 | F | ≤45 | NA    | 1   | 4  | other   | A  | N | N | N | N | AA | TT | CT | GA | DI |
| BR 288 | F | >45 | Mest  | 1   | 4  | Sertão  | B1 | N | N | N | N | AA | CT | CT | AA | DD |
| BR 289 | F | >45 | Mest  | 2-4 | 4  | other   | C  | N | N | N | N | AC | CT | CC | AA | II |
| BR 290 | M | ≤45 | Mest  | 1   | >4 | Sertão  | B1 | N | N | N | N | AC | CT | TT | AA | DD |
| BR 291 | M | >45 | White | >5  | 4  | other   | B1 | N | N | N | N | AA | CC | CT | GA | DI |
| BR 292 | F | >45 | Mest  | 2-4 | >4 | Sertão  | B1 | N | N | N | N | AA | CT | CC | GA | II |
| BR 293 | F | ≤45 | Mest  | 2-4 | >4 | Sertão  | A  | N | N | N | N | AA | CT | CT | GA | DI |
| BR 294 | F | >45 | White | 1   | 4  | other   | C  | N | N | N | N | AA | CT | CC | GA | DI |
| BR 295 | M | >45 | Mest  | 1   | 4  | Agreste | C  | N | N | N | N | AA | TT | CT | GG | DI |
| BR 296 | M | ≤45 | Mest  | 1   | 4  | Mata    | B1 | N | N | N | N | AA | CC | CT | GG | II |
| BR 297 | M | >45 | Mest  | 2-4 | 4  | Mata    | A  | N | N | N | N | AA | TT | CT | GA | DI |
| BR 298 | F | >45 | Mest  | 1   | 4  | RM      | A  | N | N | N | N | AC | TT | TT | AA | DI |
| BR 299 | F | >45 | Mest  | 1   | 4  | Sertão  | B1 | N | N | N | N | AA | TT | CC | GG | DD |
| BR 300 | F | >45 | NA    | 1   | 4  | Mata    | B1 | N | N | N | N | AA | CT | CC | GA | II |
| BR 301 | F | >45 | Black | 1   | 4  | Sertão  | A  | N | N | N | N | AA | CT | CT | AA | DD |
| BR 302 | F | >45 | Mest  | 2-4 | 4  | Mata    | B1 | N | N | N | N | AC | CT | CT | AA | DD |
| BR 303 | F | >45 | NA    | NA  | 4  | Agreste | B1 | N | N | N | N | AA | CT | CC | GG | II |
| BR 304 | F | >45 | Mest  | 1   | 4  | Mata    | B1 | N | N | N | N | AA | CT | CC | GA | DI |
| BR 305 | F | >45 | NA    | 1   | 4  | Mata    | B1 | N | N | N | N | AA | CC | CC | GA | II |
| BR 306 | F | >45 | White | 1   | 4  | other   | A  | N | N | N | N | AC | TT | CT | GA | II |
| BR 307 | F | >45 | Mest  | 2-4 | >4 | other   | B1 | N | N | N | N | AA | TT | CT | GA | DI |
| BR 308 | M | >45 | White | >5  | 4  | other   | C  | N | N | N | N | AA | TT | CT | AA | DD |

|        |   |     |       |     |    |         |    |   |   |   |   |    |    |    |    |    |
|--------|---|-----|-------|-----|----|---------|----|---|---|---|---|----|----|----|----|----|
| BR 309 | M | >45 | Mest  | 2-4 | 4  | Mata    | B1 | N | N | N | N | AC | CT | CC | GA | DI |
| BR 310 | F | ≤45 | NA    | >5  | >4 | Sertão  | A  | N | N | N | N | AA | CC | CT | GA | DD |
| BR 311 | F | >45 | White | 1   | 4  | Agreste | C  | N | N | N | N | AA | TT | CC | GA | DD |
| BR 312 | F | >45 | White | 1   | 4  | Mata    | A  | N | N | N | N | AA | CC | CT | AA | DD |
| BR 313 | F | >45 | Mest  | 2-4 | >4 | Agreste | C  | N | N | N | N | AC | CT | CC | GA | II |
| BR 314 | M | >45 | Mest  | 2-4 | 4  | Mata    | B1 | N | N | N | N | AC | CT | CC | GA | DD |
| BR 315 | M | >45 | Black | 2-4 | 4  | Mata    | B1 | N | N | N | N | NA | CT | CC | GG | DD |
| BR 316 | F | >45 | White | 1   | 4  | Mata    | B1 | N | N | N | N | NA | TT | CC | GA | DI |
| BR 317 | M | >45 | Mest  | 2-4 | 4  | Mata    | B1 | N | N | N | N | NA | CT | CT | GA | DD |
| BR 318 | M | ≤45 | Mest  | 1   | >4 | other   | A  | N | N | N | N | AC | CT | CT | AA | DD |
| BR 319 | M | ≤45 | NA    | NA  | NA | Sertão  | A  | N | N | N | N | NA | TT | CT | GG | DI |
| BR 320 | M | >45 | NA    | 1   | 4  | Sertão  | A  | N | N | N | N | AA | CT | CC | AA | DD |
| BR 321 | F | >45 | Mest  | 1   | 4  | Mata    | C  | N | N | N | N | AC | CT | CC | GA | DD |
| BR 322 | F | >45 | NA    | NA  | >4 | Agreste | B1 | N | N | N | N | AC | CT | CC | GA | DI |
| BR 323 | F | >45 | White | 1   | 4  | RM      | C  | N | N | N | N | AC | CT | CC | AA | DI |
| BR 324 | M | >45 | NA    | NA  | 4  | Mata    | C  | N | N | N | N | AA | TT | CC | GG | DI |
| BR 325 | F | >45 | Mest  | 1   | 4  | Mata    | C  | N | N | N | N | AA | CT | CC | GA | DI |
| BR 326 | M | ≤45 | Mest  | 1   | 4  | Mata    | A  | N | N | N | N | AC | TT | CC | GG | DD |
| BR 327 | M | >45 | Mest  | 1   | 4  | Agreste | B1 | N | N | N | N | AA | CT | CT | AA | DI |
| BR 328 | F | >45 | NA    | NA  | 4  | Mata    | B1 | N | N | N | N | AC | TT | CT | AA | DD |
| BR 329 | M | >45 | Black | NA  | NA | Agreste | B1 | N | N | N | N | AA | CT | CC | GA | DD |
| BR 330 | M | ≤45 | NA    | NA  | NA | NA      | A  | N | N | N | N | AA | CT | CT | GA | DI |
| BR 331 | F | >45 | Black | NA  | NA | Mata    | C  | N | N | N | N | AC | TT | CC | GA | DD |
| BR 332 | F | >45 | Black | 2-4 | 4  | Agreste | C  | N | N | N | N | AA | TT | CC | AA | DI |
| BR 333 | M | >45 | Mest  | 1   | 4  | Sertão  | A  | N | N | N | N | NA | CT | CC | GA | II |
| BR 334 | F | >45 | Mest  | 1   | 4  | other   | A  | N | N | N | N | AC | TT | CC | AA | DI |
| BR 335 | M | ≤45 | White | 1   | >4 | Sertão  | A  | Y | N | N | N | AA | CT | TT | AA | II |
| BR 336 | F | >45 | Mest  | 1   | 4  | Agreste | A  | N | N | N | N | AC | TT | CT | GA | DI |
| BR 337 | F | >45 | NA    | NA  | NA | NA      | A  | Y | N | N | N | AC | CT | CT | AA | DI |
| BR 338 | F | >45 | Mest  | 1   | 4  | other   | C  | N | Y | N | N | AC | TT | CT | AA | II |
| BR 339 | F | >45 | NA    | 1   | NA | RM      | A  | Y | N | N | N | AC | TT | CT | AA | II |
| BR 340 | F | ≤45 | Mest  | 1   | 4  | Mata    | A  | Y | N | N | N | AA | TT | CT | GG | DI |
| BR 341 | F | >45 | White | 1   | 4  | Mata    | C  | N | Y | Y | N | AA | CT | CC | GA | DI |

|        |   |     |       |     |    |         |   |   |    |    |    |    |    |    |    |    |
|--------|---|-----|-------|-----|----|---------|---|---|----|----|----|----|----|----|----|----|
| BR 342 | F | ≤45 | White | 2-4 | 4  | Sertão  | A | Y | N  | N  | N  | AA | CT | CC | GG | DD |
| BR 343 | F | >45 | Mest  | 1   | 4  | Mata    | A | Y | Y  | Y  | N  | AA | CT | CC | GG | DI |
| BR 344 | F | >45 | NA    | 1   | 4  | Mata    | A | N | Y  | N  | N  | AC | TT | CT | GA | DI |
| BR 345 | M | >45 | NA    | 1   | 4  | Agreste | A | N | N  | N  | N  | AA | CT | CT | GG | II |
| BR 346 | F | ≤45 | Mest  | 1   | 4  | Sertão  | A | N | N  | N  | N  | AC | CT | CC | AA | DI |
| BR 347 | F | >45 | Mest  | <1  | 4  | Sertão  | A | N | N  | N  | N  | AA | TT | CT | GA | II |
| BR 348 | M | >45 | Mest  | 1   | 4  | Agreste | A | Y | N  | N  | N  | AC | TT | CC | GA | II |
| BR 349 | F | ≤45 | Mest  | 1   | >4 | Sertão  | A | Y | N  | N  | N  | AC | TT | CC | GG | DD |
| BR 350 | F | ≤45 | White | 1   | >4 | RM      | A | Y | N  | N  | N  | AA | CT | CC | GG | DD |
| BR 351 | M | ≤45 | NA    | 2-4 | NA | other   | A | N | N  | N  | N  | AA | CC | CC | GA | DD |
| BR 352 | F | >45 | Mest  | 1   | 4  | Sertão  | A | N | N  | N  | N  | AC | TT | CC | AA | DI |
| BR 353 | F | ≤45 | Mest  | >5  | >4 | Agreste | A | N | N  | N  | N  | AC | TT | CC | AA | DI |
| BR 354 | F | ≤45 | Mest  | 1   | 4  | Mata    | A | Y | N  | N  | N  | AA | CT | CC | GG | DD |
| BR 355 | M | >45 | White | >5  | >4 | other   | A | N | N  | N  | N  | AA | CC | CC | GA | DD |
| BR 356 | M | >45 | White | 1   | 4  | Mata    | A | Y | NA | NA | NA | AC | TT | CT | GA | DI |
| BR 357 | F | >45 | Black | 1   | >4 | Agreste | A | Y | N  | N  | N  | AC | TT | CT | GA | DI |
| BR 358 | M | >45 | Mest  | NA  | 4  | Sertão  | C | N | Y  | Y  | Y  | AA | CT | CC | GG | DD |
| BR 359 | F | >45 | Mest  | 1   | 4  | Mata    | C | N | Y  | Y  | N  | AA | TT | CT | GG | DI |
| BR 360 | F | >45 | Black | 1   | 4  | Mata    | C | N | Y  | Y  | N  | AA | TT | CT | GG | DI |
| BR 361 | F | >45 | Mest  | 1   | >4 | Mata    | C | Y | Y  | Y  | N  | AA | TT | CC | GA | DD |
| BR 362 | F | ≤45 | NA    | 1   | 4  | Mata    | C | Y | Y  | Y  | Y  | AC | CT | CC | AA | DI |
| BR 363 | F | >45 | Mest  | 1   | 4  | Mata    | A | Y | Y  | Y  | N  | AC | TT | CC | GA | DI |
| BR 364 | M | >45 | White | 1   | 4  | Agreste | A | N | N  | N  | N  | AA | CC | CC | AA | DI |
| BR 365 | M | >45 | Mest  | 1   | 4  | Mata    | C | N | Y  | Y  | N  | AC | CT | CT | GA | II |
| BR 366 | M | ≤45 | White | 1   | 4  | other   | C | N | Y  | Y  | Y  | AA | CT | CT | GA | DI |
| BR 367 | M | ≤45 | Mest  | 2-4 | 4  | Mata    | C | N | Y  | Y  | Y  | AA | CT | CT | GA | DD |
| BR 368 | F | >45 | Mest  | 1   | 4  | other   | C | Y | Y  | N  | Y  | AA | TT | CC | GG | DI |
| BR 369 | F | ≤45 | White | 2-4 | >4 | Sertão  | A | Y | N  | N  | N  | AA | CT | CC | AA | II |
| BR 370 | F | >45 | Mest  | 1   | 4  | Mata    | A | N | N  | N  | N  | AA | CC | CC | GG | DD |
| BR 371 | M | ≤45 | White | <1  | 4  | Mata    | A | N | N  | N  | N  | AA | CT | CC | GG | II |
| BR 372 | M | ≤45 | White | 1   | 4  | Mata    | C | Y | NA | NA | NA | AC | TT | CC | GA | DI |
| BR 373 | F | ≤45 | Mest  | 1   | >4 | other   | A | Y | N  | N  | N  | AC | CT | CC | GA | DD |
| BR 374 | F | ≤45 | Mest  | <1  | 4  | Sertão  | A | N | N  | N  | N  | AC | TT | CC | GG | DI |

|               |   |     |       |     |    |         |    |    |   |   |   |    |    |    |    |    |
|---------------|---|-----|-------|-----|----|---------|----|----|---|---|---|----|----|----|----|----|
| <b>BR 375</b> | F | NA  | White | 2-4 | >4 | Sertão  | B1 | NA | N | N | N | AA | TT | CC | GA | II |
| <b>BR 376</b> | F | >45 | White | <1  | >4 | Mata    | C  | N  | Y | Y | N | AC | CT | CT | AA | DD |
| <b>BR 377</b> | M | >45 | Mest  | 1   | 4  | Mata    | A  | N  | N | N | N | AA | CT | CC | GG | DI |
| <b>BR 378</b> | F | >45 | NA    | 2-4 | 4  | Sertão  | A  | Y  | N | N | N | AA | CT | CT | GA | DI |
| <b>BR 379</b> | F | >45 | Mest  | 1   | 4  | Agreste | A  | N  | Y | N | N | AC | TT | CC | GG | DI |
| <b>BR 380</b> | F | >45 | White | 2-4 | 4  | Sertão  | A  | Y  | N | Y | N | AC | CT | CC | GA | II |
| <b>BR 381</b> | M | NA  | Mest  | 2-4 | 4  | RM      | B1 | NA | N | N | N | AA | TT | CT | GG | DI |
| <b>BR 382</b> | F | >45 | Mest  | NA  | 4  | Agreste | A  | N  | N | N | N | AA | CT | CT | AA | DD |
| <b>BR 383</b> | F | >45 | Mest  | 1   | 4  | Sertão  | A  | Y  | N | Y | N | AA | CT | CC | GG | II |
| <b>BR 384</b> | F | >45 | White | 1   | 4  | Agreste | A  | N  | N | N | N | AA | CT | CT | GA | II |
| <b>BR 385</b> | M | ≤45 | Mest  | 2-4 | 4  | Sertão  | A  | N  | N | N | N | AA | NA | NA | GG | DI |
| <b>BR 386</b> | F | ≤45 | Mest  | <1  | 4  | RM      | A  | N  | N | N | N | AC | TT | CT | GA | II |
| <b>BR 387</b> | F | ≤45 | Mest  | 1   | 4  | Agreste | A  | Y  | N | N | N | AA | TT | CT | GG | II |
| <b>BR 388</b> | M | ≤45 | Mest  | 1   | 4  | Sertão  | A  | N  | N | Y | N | AC | TT | CC | GA | DD |
| <b>BR 389</b> | F | >45 | White | 1   | 4  | Mata    | A  | N  | N | N | N | AA | TT | NA | GA | II |
| <b>BR 390</b> | M | ≤45 | Mest  | 1   | 4  | other   | A  | Y  | N | N | N | AA | TT | CC | GG | DD |
| <b>BR 391</b> | F | ≤45 | Mest  | 1   | 4  | other   | A  | N  | N | N | N | AA | CT | CC | GA | DD |
| <b>BR 392</b> | F | ≤45 | Mest  | 1   | >4 | Sertão  | A  | N  | N | N | N | AA | CT | CT | AA | II |
| <b>BR 393</b> | F | >45 | Mest  | 1   | 4  | Agreste | A  | N  | N | Y | N | AC | CT | CC | GA | DD |
| <b>BR 394</b> | F | ≤45 | Black | 1   | 4  | Agreste | A  | Y  | N | N | N | AC | TT | CT | AA | II |
| <b>BR 395</b> | F | ≤45 | Mest  | <1  | 4  | Mata    | C  | N  | Y | Y | Y | AA | TT | CC | GG | DD |
| <b>BR 396</b> | M | >45 | White | 1   | 4  | Mata    | A  | N  | N | N | N | AA | CT | CT | GA | II |
| <b>BR 397</b> | F | >45 | White | 1   | NA | Mata    | A  | N  | N | Y | N | AA | CC | NA | NA | DI |
| <b>BR 398</b> | F | >45 | Mest  | 2-4 | 4  | other   | A  | N  | N | Y | N | AA | CT | CC | GG | II |
| <b>BR 399</b> | M | ≤45 | White | 2-4 | 4  | Agreste | A  | N  | N | N | N | AC | CT | CC | GA | DI |
| <b>BR 400</b> | F | >45 | Black | 2-4 | 4  | Mata    | A  | N  | N | N | N | AA | CT | CC | GA | DI |
| <b>BR 401</b> | F | >45 | Mest  | 1   | 4  | RM      | C  | Y  | N | Y | N | AA | CT | CT | AA | DI |
| <b>BR 402</b> | F | >45 | Mest  | NA  | 4  | RM      | A  | N  | N | N | N | AA | CT | CC | GG | DI |
